# Supplementary material for: Efficient sensing of nitrite by Fe(bpy)32+ immobilized Nafion modified electrodes
Source: Royal Society of Chemistry journal article supplement (doi:10.1039/c0cc00852d), 2010-01-01
Supplement: c0cc00852d.pdf [file c0cc00852d.pdf]

**Supplementary Material**

**Efficient sensing of nitrite by  $\text{Fe}(\text{bpy})_3^{2+}$  immobilized Nafion  
modified electrodes**

**Uday Pratap Azad and Vellaichamy Ganesan\***

*Department of Chemistry, Faculty of Science*

*Banaras Hindu University, Varanasi-221 005, India.*

*E-mail: [velganesh@yahoo.com](mailto:velganesh@yahoo.com) and [velgan@bhu.ac.in](mailto:velgan@bhu.ac.in)*

*Fax: + 91-542-2368127; Tel: + 91-542-2307321*

### **Amount of $\text{Fe}(\text{bpy})_3^{2+}$ exchanged/adsorbed on the GC/Nf electrode:**

The amount of  $\text{Fe}(\text{bpy})_3^{2+}$  adsorbed on the GC/Nf electrode was calculated by measuring the difference in the absorbance of  $\text{Fe}(\text{bpy})_3^{2+}$  solution before and after dipping the GC/Nf electrode.

Absorbance of measured volume of  $\text{Fe}(\text{bpy})_3^{2+}$  solution before the dipping of GC/Nf electrode is measured. From the absorbance, amount of  $\text{Fe}(\text{bpy})_3^{2+}$  ( $x_1$  mol) present in the solution is calculated according to equation 1 (Reference A).

$$x_1 = (\text{Absorbance}/\epsilon l) * (V/1000) \text{ mol} \quad \dots(1)$$

where ‘ $\epsilon$ ’ is the molar extinction coefficient ( $\text{L} \cdot \text{mol}^{-1} \cdot \text{cm}^{-1}$ ), ‘ $l$ ’ is the path length (cm) ‘ $V$ ’ is the volume of  $\text{Fe}(\text{bpy})_3^{2+}$  solution (mL).

Similarly, after dipping the GC/Nf electrode for approximately 30 min. the absorbance of the solution is measured again and the amount of  $\text{Fe}(\text{bpy})_3^{2+}$  ( $x_2$  mole) remaining in the solution is calculated. The difference in amount of  $\text{Fe}(\text{bpy})_3^{2+}$  ( $(x_1 - x_2)$  mole) is exchanged/adsorbed on the GC/Nf electrode. As one molecule of  $\text{Fe}(\text{bpy})_3^{2+}$  will exchange two protons from two  $-\text{SO}_3\text{H}$  groups, one mol of  $\text{Fe}(\text{bpy})_3^{2+}$  is considered as two equivalents.

Reference A:

D. A. Skoog, E. J. Holler and T. A. Nieman, Principles of Instrumental Analysis, Fifth edition (1998), Saunders College Publishing, Philadelphia, USA.

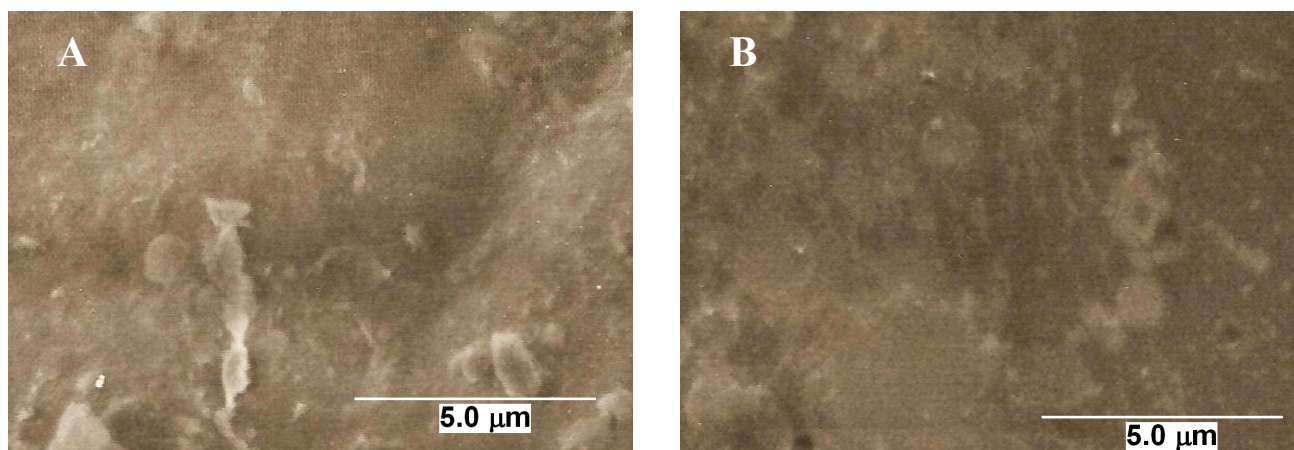

**Fig. S1.** SEM images of GC/Nf (A) and GC/Nf/Fe(bpy)<sub>3</sub><sup>2+</sup> (B) films coated on a glass plate.

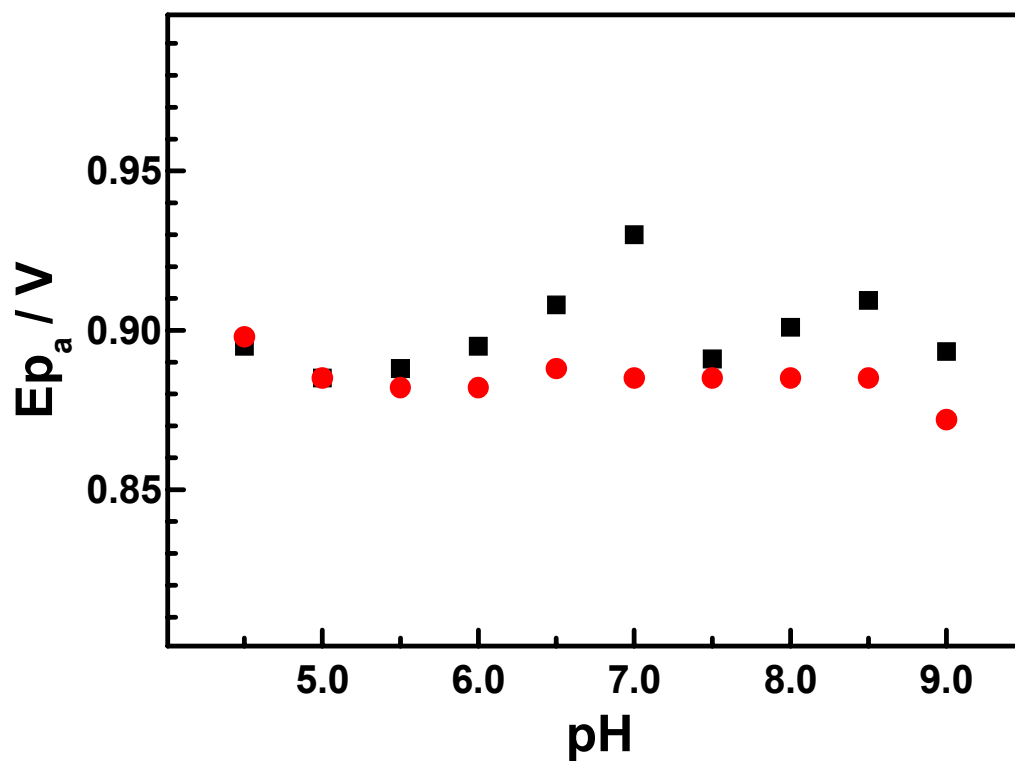

**Fig. S2.** Effect of pH on the oxidation peak potentials ( $Ep_a$ ) of  $Fe(bpy)_3^{2+}$  (●) and nitrite (■) at the GC/Nf/  $Fe(bpy)_3^{2+}$  electrodes. Note: ‘●’ are obtained in the absence of nitrite. ‘■’ are obtained in the presence of 5.0 mM nitrite.

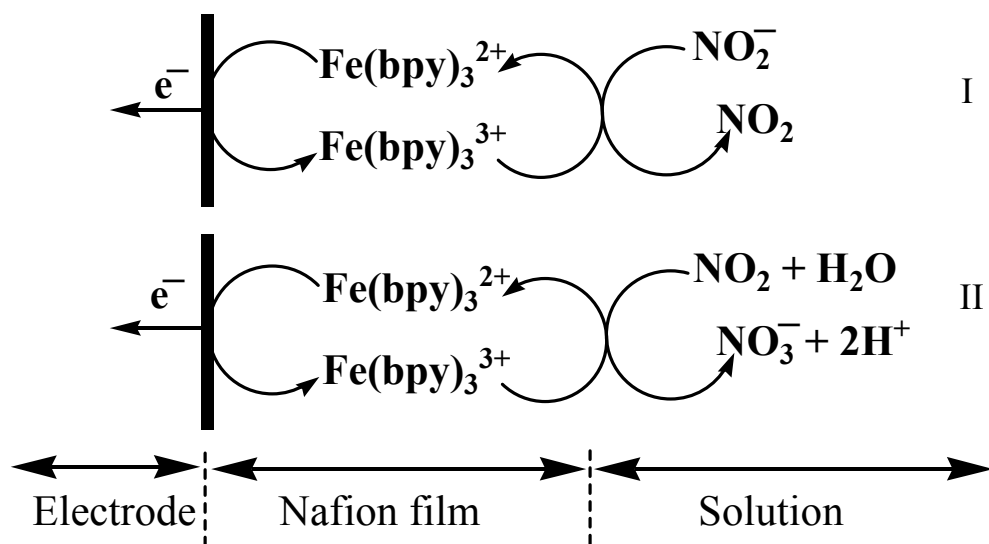

**Scheme S1.** Schematic representation of electrocatalytic oxidation of  $\text{NO}_2^-$  at the GC/Nf/ $\text{Fe}(\text{bpy})_3^{2+}$  electrodes.

**Table S1.** Influence of interferences on the oxidation peak current of 1.0 mM  $\text{NO}_2^-$  at GC/Nf/ $\text{Fe}(\text{bpy})_3^{2+}$  electrodes.

| Interference               | Signal change % |
|----------------------------|-----------------|
| $\text{Cl}^-$              | + 5.7           |
| $\text{NO}_3^-$            | + 3.8           |
| $\text{HCO}_3^-$           | - 3.6           |
| $\text{CH}_3\text{CO}_2^-$ | - 1.2           |
| $\text{Cu}^{2+}$           | - 1.1           |
| $\text{K}^+$               | + 3.2           |
| $\text{O}_2$               | + 0.6           |
| Glucose                    | + 1.2           |
| Urea                       | + 5.5           |

**Table S2.** Recovery analysis for nitrite oxidation at GC/Nf/Fe(bpy)<sub>3</sub><sup>2+</sup> electrodes.

| Sample                                    | Nitrite added (mM) | Nitrite found (mM) | Recovery (%) | Relative standard deviation (%) |
|-------------------------------------------|--------------------|--------------------|--------------|---------------------------------|
| Tap water                                 | 1.0                | 0.94               | 94           | 1.5 (n = 5)                     |
| Packaged drinking water (a popular brand) | 1.0                | 0.96               | 96           | 0.9 (n = 6)                     |
